# Supplementary material for: Novel catalytic effects in ester aminolysis in chlorobenzene
Source: Royal Society of Chemistry journal article supplement (doi:10.1039/b504629g), 2005-01-01
Supplement: b504629g.pdf [file b504629g.pdf]

## Supporting Information Available

**Table 1.** Influence of *n*-butylamine concentration for the aminolysis of NPA in chlorobenzene. [NPA]= $5 \times 10^{-5}$  M. T=25°C.

| [BA], M | $k_{\text{obs}}$ , s <sup>-1</sup> |
|---------|------------------------------------|
| 0.02    | $1.780 \times 10^{-3}$             |
| 0.04    | $2.722 \times 10^{-3}$             |
| 0.06    | $3.836 \times 10^{-3}$             |
| 0.08    | $4.914 \times 10^{-3}$             |
| 0.10    | $6.339 \times 10^{-3}$             |
| 0.15    | $9.265 \times 10^{-3}$             |
| 0.18    | $1.175 \times 10^{-2}$             |
| 0.22    | $1.427 \times 10^{-2}$             |
| 0.30    | $2.058 \times 10^{-2}$             |
| 0.40    | $2.806 \times 10^{-2}$             |

**Table 2.** Influence of *n*-butylamine concentration for the aminolysis of NPA in chlorobenzene. [G]=0.1M; [NPA]= $5 \times 10^{-5}$  M. T=25°C.

| [BA], M | $k_{\text{obs}}$ , s <sup>-1</sup> |
|---------|------------------------------------|
| 0.02    | $7.463 \times 10^{-4}$             |
| 0.04    | $1.590 \times 10^{-3}$             |
| 0.08    | $3.404 \times 10^{-3}$             |
| 0.10    | $4.374 \times 10^{-3}$             |
| 0.15    | $6.971 \times 10^{-3}$             |
| 0.30    | $1.753 \times 10^{-2}$             |
| 0.40    | $2.710 \times 10^{-2}$             |

**Table 3.** Influence of *n*-butylamine concentration for the aminolysis of NPA in chlorobenzene. [G]=0.25M; [NPA]= $5 \times 10^{-5}$ M. T=25°C.

| [BA] , M | $k_{\text{obs}}$ , s <sup>-1</sup> |
|----------|------------------------------------|
| 0.02     | $1.731 \times 10^{-3}$             |
| 0.04     | $3.520 \times 10^{-3}$             |
| 0.08     | $7.223 \times 10^{-3}$             |
| 0.10     | $9.245 \times 10^{-3}$             |
| 0.15     | $1.422 \times 10^{-2}$             |
| 0.30     | $3.254 \times 10^{-2}$             |
| 0.40     | $4.857 \times 10^{-2}$             |

**Table 4.** Influence of *n*-butylamine concentration for the aminolysis of NPA in chlorobenzene. [G]=0.5M; [NPA]= $5 \times 10^{-5}$ M. T=25°C.

| [BA] , M | $k_{\text{obs}}$ , s <sup>-1</sup> |
|----------|------------------------------------|
| 0.02     | $3.325 \times 10^{-3}$             |
| 0.04     | $6.797 \times 10^{-3}$             |
| 0.08     | $1.398 \times 10^{-2}$             |
| 0.10     | $1.785 \times 10^{-2}$             |
| 0.15     | $2.769 \times 10^{-2}$             |
| 0.30     | $5.995 \times 10^{-2}$             |
| 0.40     | $8.413 \times 10^{-2}$             |

**Table 5.** Influence of *n*-butylamine concentration for the aminolysis of NPA in chlorobenzene. [G]=0.75M; [NPA]= $5 \times 10^{-5}$ M. T=25°C.

| [BA] , M | $k_{obs}$ , s <sup>-1</sup> |
|----------|-----------------------------|
| 0.02     | $4.698 \times 10^{-3}$      |
| 0.04     | $9.713 \times 10^{-3}$      |
| 0.08     | $1.958 \times 10^{-2}$      |
| 0.10     | $2.473 \times 10^{-2}$      |
| 0.15     | $3.817 \times 10^{-2}$      |
| 0.30     | $8.235 \times 10^{-2}$      |
| 0.40     | $1.152 \times 10^{-1}$      |

**Table 6.** Influence of *n*-butylamine concentration for the aminolysis of NPA in chlorobenzene. [G]=1.0M; [NPA]= $5 \times 10^{-5}$ M. T=25°C.

| [BA] , M | $k_{obs}$ , s <sup>-1</sup> |
|----------|-----------------------------|
| 0.02     | $6.018 \times 10^{-3}$      |
| 0.04     | $1.216 \times 10^{-2}$      |
| 0.08     | $2.480 \times 10^{-2}$      |
| 0.10     | $3.229 \times 10^{-2}$      |
| 0.15     | $4.636 \times 10^{-2}$      |
| 0.30     | $1.029 \times 10^{-1}$      |
| 0.40     | $1.444 \times 10^{-1}$      |

**Table 7.** Influence of *n*-butylamine concentration for the aminolysis of NPC in chlorobenzene. [NPC]= $5 \times 10^{-5}$ M. T=25°C.

| [BA] , M | $k_{\text{obs}}$ , s <sup>-1</sup> |
|----------|------------------------------------|
| 0.02     | $7.701 \times 10^{-6}$             |
| 0.06     | $6.668 \times 10^{-5}$             |
| 0.10     | $1.894 \times 10^{-4}$             |
| 0.15     | $4.188 \times 10^{-4}$             |
| 0.22     | $9.657 \times 10^{-4}$             |
| 0.30     | $1.948 \times 10^{-3}$             |
| 0.40     | $3.413 \times 10^{-3}$             |

**Table 8.** Influence of *n*-butylamine concentration for the aminolysis of NPC in chlorobenzene. [G]=0.1M; [NPC]= $5 \times 10^{-5}$ M. T=25°C.

| [BA] , M | $k_{\text{obs}}$ , s <sup>-1</sup> |
|----------|------------------------------------|
| 0.02     | $1.302 \times 10^{-4}$             |
| 0.06     | $5.185 \times 10^{-4}$             |
| 0.10     | $9.191 \times 10^{-4}$             |
| 0.15     | $1.603 \times 10^{-3}$             |
| 0.22     | $2.768 \times 10^{-3}$             |
| 0.30     | $4.376 \times 10^{-3}$             |
| 0.40     | $7.369 \times 10^{-3}$             |

**Table 9.** Influence of *n*-butylamine concentration for the aminolysis of NPC in chlorobenzene. [G]=0.25M; [NPC]= $5 \times 10^{-5}$ M. T=25°C.

| [BA] , M | $k_{\text{obs}}$ , s <sup>-1</sup> |
|----------|------------------------------------|
| 0.02     | $3.559 \times 10^{-4}$             |
| 0.06     | $1.376 \times 10^{-3}$             |
| 0.10     | $2.280 \times 10^{-3}$             |
| 0.15     | $3.702 \times 10^{-3}$             |
| 0.22     | $5.873 \times 10^{-3}$             |
| 0.30     | $8.879 \times 10^{-3}$             |
| 0.40     | $1.346 \times 10^{-2}$             |

**Table 10.** Influence of *n*-butylamine concentration for the aminolysis of NPC in chlorobenzene. [G]=0.5M; [NPC]= $5 \times 10^{-5}$ M. T=25°C.

| [BA] , M | $k_{\text{obs}}$ , s <sup>-1</sup> |
|----------|------------------------------------|
| 0.02     | $7.392 \times 10^{-4}$             |
| 0.06     | $2.665 \times 10^{-3}$             |
| 0.10     | $4.627 \times 10^{-3}$             |
| 0.15     | $7.340 \times 10^{-3}$             |
| 0.22     | $1.156 \times 10^{-2}$             |
| 0.30     | $1.696 \times 10^{-2}$             |
| 0.40     | $2.457 \times 10^{-2}$             |

**Table 11.** Influence of *n*-butylamine concentration for the aminolysis of NPC in chlorobenzene. [G]=0.75M; [NPC]=5×10<sup>-5</sup>M. T=25°C.

| [BA] , M | k <sub>obs</sub> , s <sup>-1</sup> |
|----------|------------------------------------|
| 0.02     | 1.269×10 <sup>-3</sup>             |
| 0.06     | 4.017×10 <sup>-3</sup>             |
| 0.10     | 7.017×10 <sup>-3</sup>             |
| 0.15     | 1.102×10 <sup>-2</sup>             |
| 0.22     | 1.701×10 <sup>-2</sup>             |
| 0.30     | 2.465×10 <sup>-2</sup>             |
| 0.40     | 3.545×10 <sup>-2</sup>             |

**Table 12.** Influence of *n*-butylamine concentration for the aminolysis of NPC in chlorobenzene. [G]=1.0M; [NPC]=5×10<sup>-5</sup>M. T=25°C.

| [BA] , M | k <sub>obs</sub> , s <sup>-1</sup> |
|----------|------------------------------------|
| 0.02     | 1.689×10 <sup>-3</sup>             |
| 0.06     | 5.753×10 <sup>-3</sup>             |
| 0.10     | 9.937×10 <sup>-3</sup>             |
| 0.15     | 1.532×10 <sup>-2</sup>             |
| 0.22     | 2.356×10 <sup>-2</sup>             |
| 0.30     | 3.266×10 <sup>-2</sup>             |
| 0.40     | 4.537×10 <sup>-2</sup>             |
